# Supplementary material
Source: publisher site journal article supplement (https://www.dovepress.com/article/360645)
Supplement: Supplementary file 1 [file get_supplementary_file.php]

**Supplemental Table 1. Comparison of Spine-Related Disorders Between Underserved and Non-underserved Counties**

| **Five-year Prevalence** | | | | |
| --- | --- | --- | --- | --- |
| **Pain Symptoms**  **(prevalence per 100 people)** | **Overall Cohort (n=27)** | **MUA**  **(n=22)** | **Not MUA**  **(n=5)** | ***P* value** |
| Lumbago | 11.1 ± 2.0 | 10.9 ± 2.1 | 11.8 ± 1.9 | 0.381 |
| Spondylosis | 4.8 ± 1.7 | 4.8 ± 1.5 | 4.8 ± 2.5 | 0.982 |
| Intervertebral Disc Disorders | 5.1 ± 1.4 | 5.2 ± 1.2 | 4.9 ± 2.2 | 0.690 |
| Cervical Radiculitis | 1.2 ± 0.2 | 1.1 ± 0.2 | 1.2 ± 0.3 | 0.584 |
| Lumbar Spinal Stenosis | 1.1 ± 0.2 | 1.1 ± 0.2 | 1.1 ± 0.2 | 0.548 |
| Sciatica | 1.4 ± 0.5 | 1.4 ± 0.5 | 1.5 ± 0.3 | 0.924 |
| Thoracic/Lumbosacral Radiculitis | 2.5 ± 0.4 | 2.5 ± 0.4 | 2.6 ± 0.4 | 0.584 |
| Backache | 8.0 ± 1.9 | 7.9 ± 1.9 | 8.5 ± 2.1 | 0.535 |

Mean and standard deviation are provided for all continuous variables and stratified based on medically underserved area (MUA) status. Linear regression analysis was performed to compare outcomes based on MUA status. These analyses were performed for five-year prevalence data (January 1, 2011 to January 1, 2016). These prevalence values were directly standardized based on age and sex to the total United States 2010 population.

**Supplemental Table 2. Association Between IMU Score and Outcomes of Spine-Related Disorders**

| **Five-year Prevalence** | | |
| --- | --- | --- |
| **Pain Symptoms**  **(prevalence per 100 people)** | **Β-coefficient (95% C.I.)** | ***P* value** |
| Lumbago | -0.05 (-0.16 – 0.06) | 0.379 |
| Spondylosis | 0.02 (-0.06 – 0.10) | 0.622 |
| Intervertebral Disc Disorders | -0.03 (-0.09 – 0.04) | 0.365 |
| Cervical Radiculitis | 0.00 (-0.01 – 0.00) | 0.290 |
| Lumbar Spinal Stenosis | 0.00 (-0.01 – 0.01) | 0.684 |
| Sciatica | -0.01 (-0.04 – 0.02) | 0.372 |
| Thoracic/Lumbosacral Radiculitis | -0.01 (-0.03 – 0.01) | 0.306 |
| Backache | -0.05 (-0.15 – 0.05) | 0.298 |

Linear regression analysis was performed to identify any association between the Index of Medical Underservice (IMU) score and variables related to spine-related pain disorders. Beta-coefficient and 95% C.I. (confidence interval) are reported for each association. These analyses were performed for five-year prevalence data (January 1,2011 to January 1, 2016). These prevalence values were directly standardized based on age and sex to the total United States 2010 population.

MUA = medically underserved area
